# Supplementary material
Source: PubMed Central journal article supplement (PMC6601037)
Supplement: EMBJ-38-e101516-s002.pdf [file EMBJ-38-e101516-s002.pdf]

## Expanded View Figures

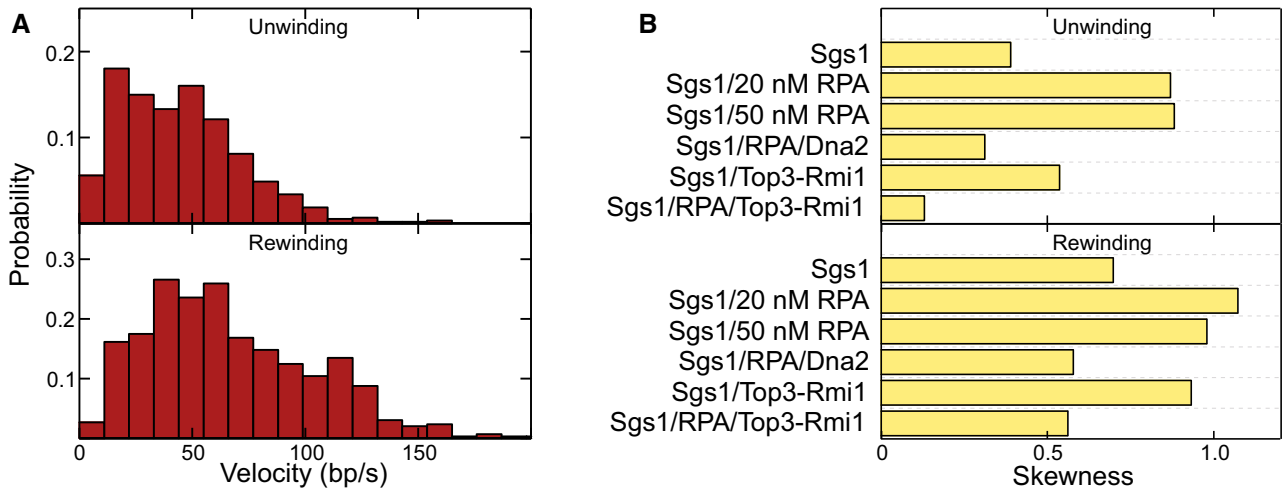

**Figure EV1. Skewness of the velocity distributions for unwinding and rewinding for the different protein combinations.**

A Histograms of the observed unwinding and rewinding velocities for Sgs1 in the presence of 50 nM RPA. The mean unwinding rate was  $46 \pm 3$  bp/s ( $N = 597$ ). The mean rewinding rate was  $68 \pm 3$  bp/s ( $N = 594$ ).  
 B The skewness was calculated for the data shown in the velocity histograms in the main text.

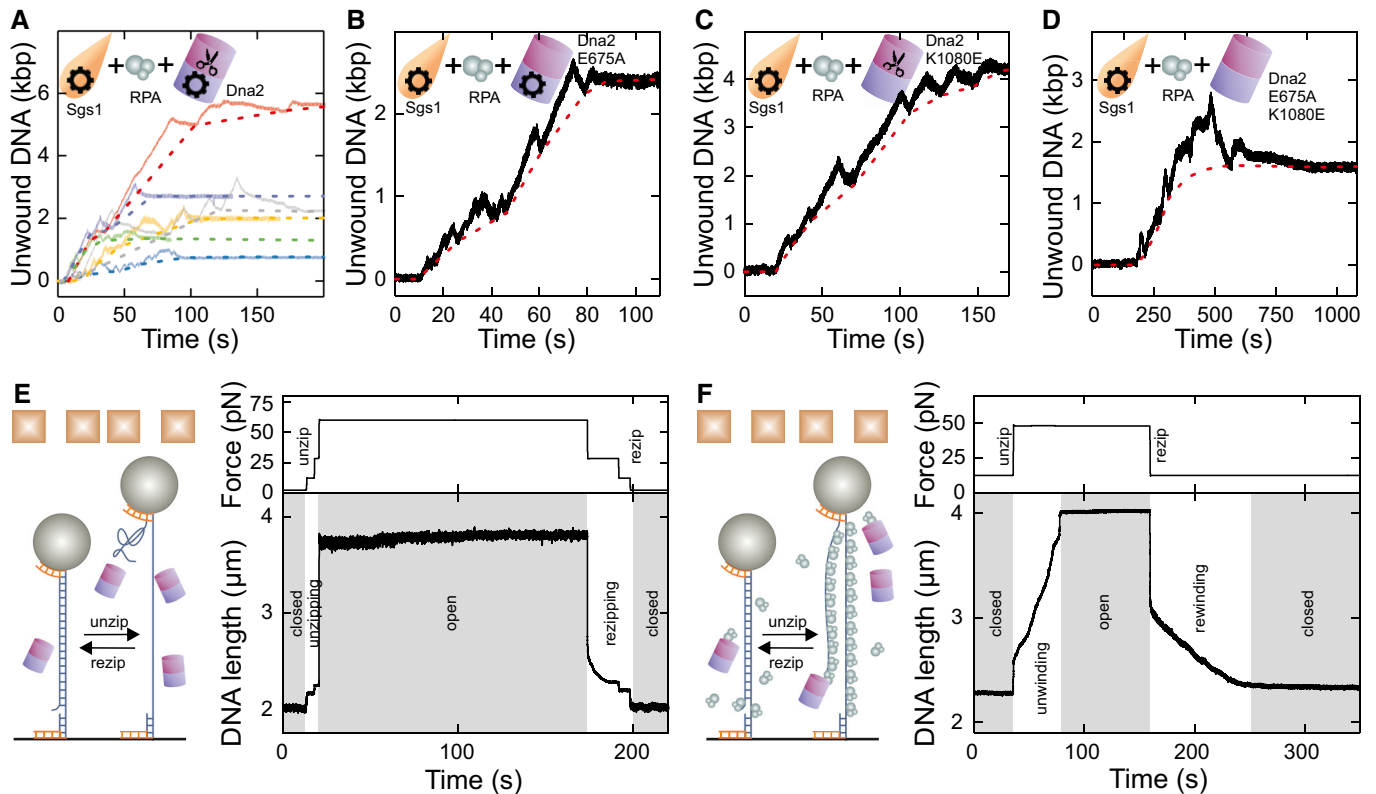

**Figure EV2. DNA duplex processing by the DNA resection complex containing Sgs1, RPA, and mutated Dna2.**

- A Different dsDNA processing events in the presence of Sgs1, Dna2, and RPA. Solid lines show the measured DNA unwinding, while dashed lines reveal the estimated Dna2 position.
- B dsDNA processing event in the presence of Sgs1, RPA, and the nuclease-dead mutant Dna2 E675A.
- C dsDNA processing event in the presence of Sgs1, RPA, and the helicase-dead mutant Dna2 K1080E.
- D dsDNA processing event in the presence of Sgs1, RPA, and the double helicase- and nuclease-dead mutant Dna2 E675A K1080E.
- E Mechanical unzipping of dsDNA in the presence of Dna2 E675A K1080E does not lead to inhibited DNA re-zipping. dsDNA was mechanically unzipped in the presence of Dna2 E675A K1080E and kept open for > 100 s. Subsequently re-zipping was induced by stepwise reduction of the applied force. The DNA length resumed to the original level, indicating re-zipping over the entire molecule length.
- F Mechanical unzipping of dsDNA in the presence of RPA and Dna2 E675A K1080E does not lead to inhibited DNA re-zipping. dsDNA was mechanically unwound in the presence of RPA and Dna2 E675A K1080E. After keeping it in the unwound form for ~70 s, the force was lowered to allow DNA rewinding against the bound RPA. The DNA length resumed to the original level, indicating that the rewinding occurred over the entire molecule length.

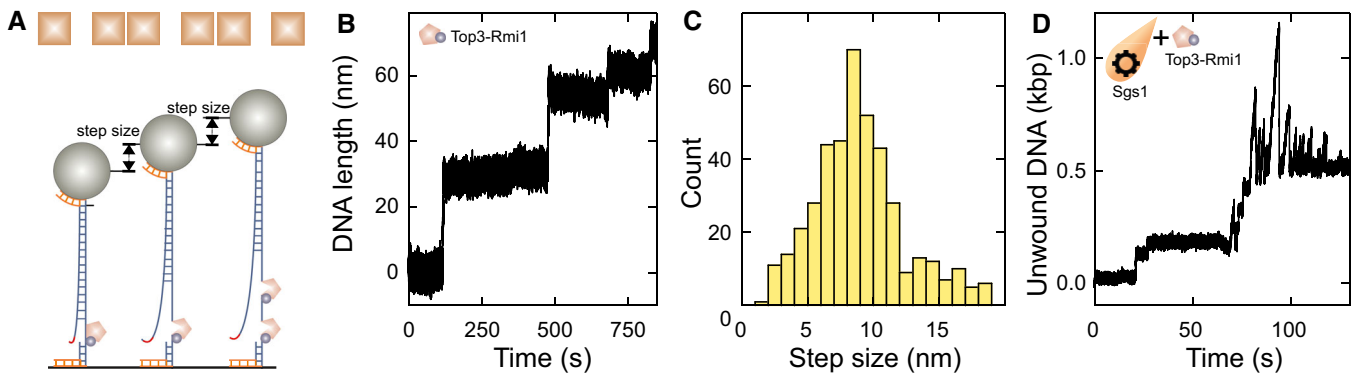

**Figure EV3. Top3-Rmi1 cleavage activity of ssDNA.**

- A Scheme illustrating the Top3-Rmi1 ssDNA cleavage activity observed in the magnetic tweezers assay.
- B Stepwise DNA length increase seen in the presence of Top3-Rmi1.
- C Histogram of the size of the stepwise length increase having a mean of  $8.6 \pm 0.2$  nm ( $N = 433$ ).
- D dsDNA processing events observed for Sgs1 in the presence of Top3-Rmi1. Stepwise DNA elongation due to ssDNA cleavage by Top3-Rmi is observed together with dsDNA unwinding–re-zipping bursts by Sgs1.

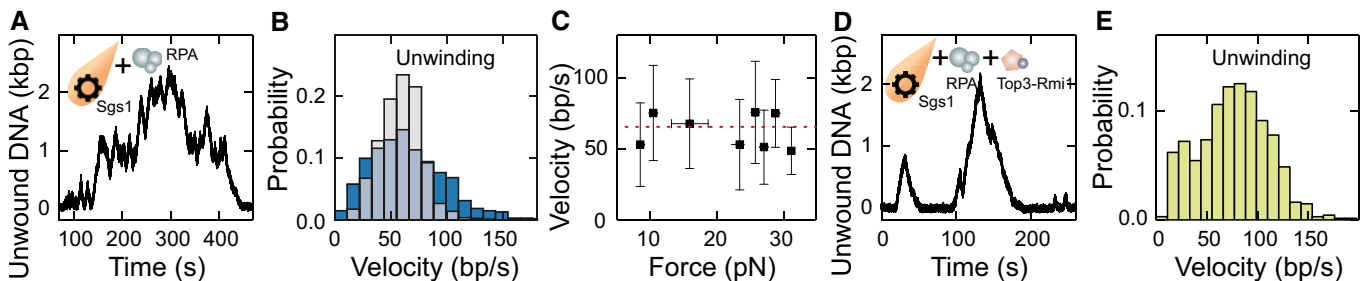

**Figure EV4. DNA duplex processing by Sgs1 together with RPA and Top3-Rmi1 at high-salt conditions.**

- A dsDNA processing events observed for Sgs1 in the presence of RPA at high-salt conditions.
- B Histograms of unwinding velocity of Sgs1 in the presence of RPA at high-salt conditions. Shown are the velocities in the presence of 20 nM RPA (gray) and 200 nM RPA (dark blue). Mean unwinding velocities are  $v = 59 \pm 2$  bp/s ( $N = 860$ ) and  $v = 65 \pm 3$  bp/s ( $N = 1,095$ ) for 20 and 200 nM RPA, respectively.
- C Force dependence of the Sgs1 unwinding (black squares) ( $N = 1,095$ ) velocities in the presence of 200 nM RPA. Red dashed lines represent mean values of the velocities, and error bars represent the standard deviation of the mean.
- D dsDNA processing events observed for Sgs1 in the presence of RPA and Top3-Rmi1 at high-salt conditions.
- E Histogram of the unwinding velocity of Sgs1 in the presence of RPA and Top3-Rmi1. The mean unwinding velocity was  $v = 77 \pm 4$  bp/s ( $N = 678$ ).

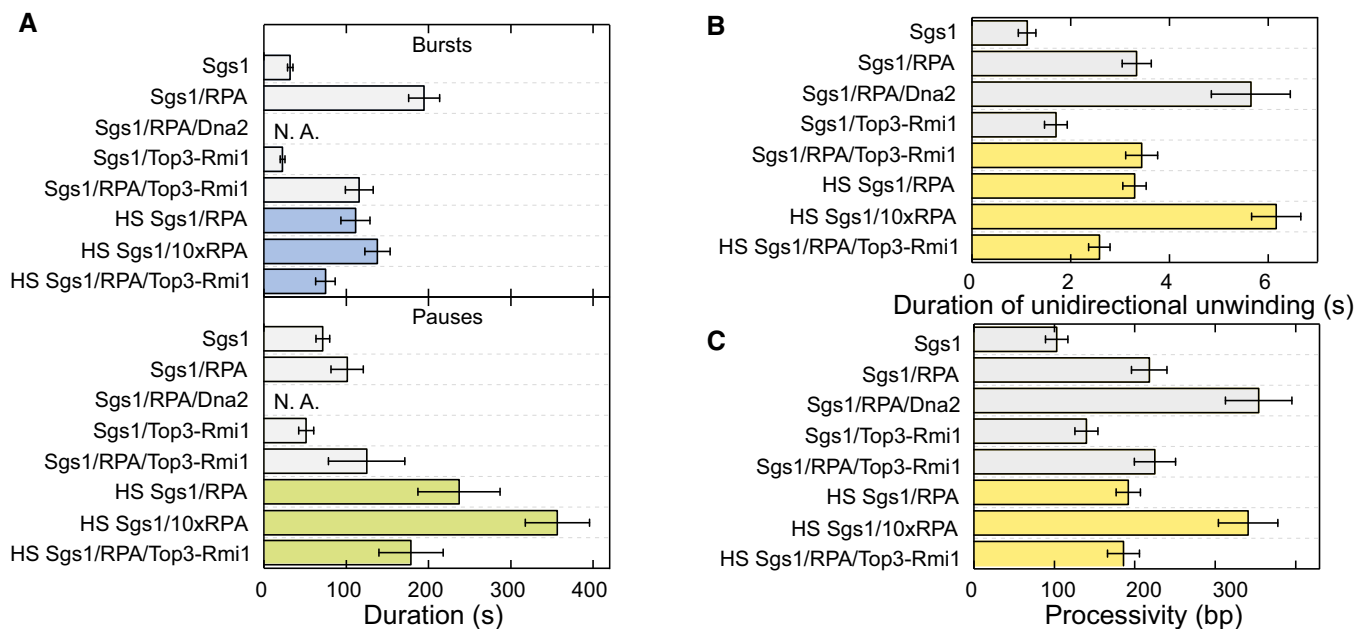

**Figure EV5. Directionality, processivity, and initiation of DNA processing events for the different protein combinations at high-salt conditions.**

A Mean duration of bursts (upper panel, violet bars) ( $N > 40$ ) and pauses (lower panel, green bars) ( $N > 40$ ) for the different enzyme combinations at high-salt conditions. Error bars represent standard error of the mean.  
 B Mean duration of unidirectional unwinding ( $N > 650$ ). Error bars represent standard error of the mean.  
 C Mean processivity of unidirectional unwinding by the enzyme(s) ( $N > 650$ ). Error bars represent standard error of the mean.
